# Supplementary material
Source: ML conference proceedings conference paper supplement (https://openaccess.thecvf.com/content/WACV2026/html/Djeghim_SAIL_Self-supervised_Learning_WACV_2026_paper.html)

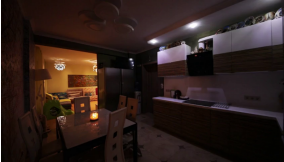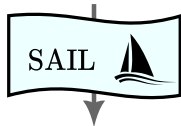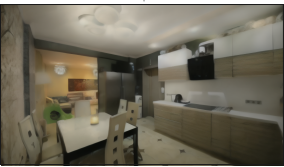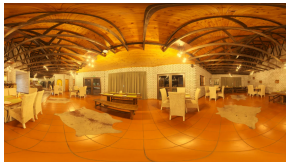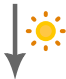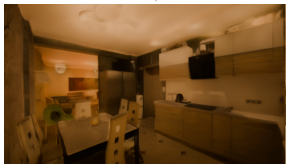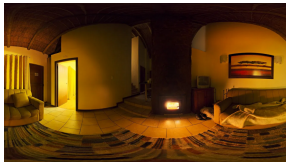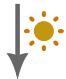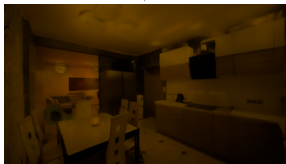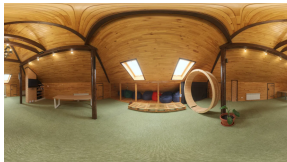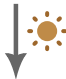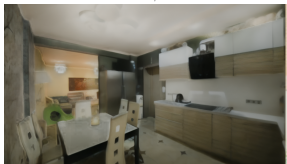

Supplement: Supplementary file 2 [file teaser_2.pdf › 2454_supp/static/images/teaser_2.pdf]
